# Supplementary material
Source: PubMed Central journal article supplement (PMC3416365)
Supplement: supp_78.14.4893_AEM07588-11_FigS2.pdf [file supp_78.14.4893_AEM07588-11_FigS2.pdf]

1 MAVSIFQVSFEHHR**TALGIGEASPRISWQFEGDAGNWSQSGYSIEVSRQ GKADVF**NVTSS 60  
 61 DSVLVDWPTVALSSAESALVRVKAYGADSVDTDWSEAFPVETGLLADDDWSGAQVIAANK 120  
 121 **TTEQNVPHQPILLRKDFSLDGDVSSARLYITAYGIYEAFINGDRVGDAVLAPGWQSYNHR** 180  
 181 LVYD**TYDV**TSL**LQSGSNAIGVHV**GEGWYAGRIGFSTSRNIWGD**TLGAFALLVVT**KADGSK 240  
 241 ETIPTDLTWSSSTGAIITSEIYDGELY**NSTLDQPGWATVDFK**APESA**EWIGVKELK**SPLG 300  
 301 R**LSAPDGPPIQR****V**EEVQLQEVIITTPSGATVLD**FGQNLV**GWLQ**LNV**TGPAGTAIK**MVHVEV** 360  
 361 **LEKGEIAIGPLRS**AK**QTD**T**VILSGSAQTWEPTFTYHGFRYVQVDNWPVEQTPLDQ**HAVKA 420  
 421 **IVVHSDMQRTGDLETS**DSLLNKLIHN**VLSL**KGNFMSIPT**DCPQRDERL**GW**TGDA**HAFAP 480  
 481 **TANFLYNPAGFWR**GW**MK****DVVSEQLEMDNIVPVVVPYVPAVGP**KMP**TAVWGDVV**ANAWNA 540  
 541 **YQAFGDV**GALRAQYVGAKAWIDGGIPRGADGLWDHTYFQ**FGDWLDPK**APAD**NP**GAAT**TDS** 600  
 601 **GLVADAYLVVY**TGLVSKMAAVLGLDAEAAEYAASVA**ALKKAYQA**AWISADGIVKYET**QTG** 660  
 661 **LALS**LYFGLFPDGQDG**PAAQR**L**QNIVE**ANDYRVGTGFAGTHLLGQTLTAY**NLT**DAFY**SML** 720  
 721 MQTSVPSWLYQVVENGTT**WER**WDSLLPDGSLNANMMTSFNHYAFGSVVN**WMVR****TIGGLA** 780  
 781 **PAEPGWKTISVAPI**PGGGLT**SAKTTYLS**PYGRVSAE**WTVNEGTFNLK**LIVPPNSRA**EVAL** 840  
 841 **PGDNGRVMNVGSG**TH**TFK**LSGVAGKE 866

 putative Calcium binding

 catalytic residues or substrate recognition for rhamnosidase activity

 intron position

**bold** = covered by peptide mapping (total = 68,82%)

**peptides of the SDS protein fragments: blue = 39 kDa (PSM>7); red = 62 kDa (PSM>5)**

underlined = putative N glycosylation sites

**pfam08531** = alpha-L-rhamnosidase N-terminal domain

**pfam05592** = bac\_rhamnosid\_N superfamily

**catalytical domain (A)** = according structure of 2OKX (Bacillus, Cui et al.)

**Figure S 2:** Amino acid sequence of *X. polymorpha* hydrolase (*XpoGH78*), conserved amino acids and domains (pfam08531; pfam05592), potential N-glycosylation sites, putative calcium binding, and intron positions are marked. Bold letters represent the peptides identified by peptide mapping.
