# Supplementary material
Source: PubMed Central journal article supplement (PMC3416365)
Supplement: supp_78.14.4893_AEM07588-11_TableS1.pdf [file supp_78.14.4893_AEM07588-11_TableS1.pdf]

**TABLE S 1:** Oligonucleotides used as primers for the identification of the *Xpo*GH78 encoding gene.

Sequences are written according to the International Union of Pure and Applied Chemistry nucleotide code, rG ribonucleotide guanosine, I inosine wobble base.

| Primer name         | Sequence (5' → 3')                                  |
|---------------------|-----------------------------------------------------|
| FP_R176_B           | GTNCTIGCNCCNGGNTGGCA                                |
| RP_R176_B           | TGCCAICCNNGGNGCNAGNAC                               |
| RP_R755_A           | CCANCGYTCCCANRTNGTNGT                               |
| FP_R317             | GCNCCNGAYGGNCCNCC                                   |
| FP_R6_A             | TTYCARGTNTCNTTYGARCA YCA                            |
| FP_SRH_002          | ACAAACCGACACCGTAATCCTG                              |
| RP_SRH_002          | ACAGGATTACGGTGTCTGGTTTG                             |
| RP_R406_A           | CGRAANCCRTGRWANGTRAA                                |
| RP_R406_B           | CTRAANCCRTGRWANGTRAA                                |
| FP_SRH_006          | CTCGGTAGCGGCGTTGAA                                  |
| Heel-Carrier        | GTAATACGACTCACTATAGGGCAAGCAGTGGTATCAACGCAGAGT       |
| Heel-Specific       | GTAATACGACTCACTATAGGGC                              |
| TS-Short            | AAGCAGTGGTATCAACGCAGAGTACGCrGrGrG                   |
| oligo(dT)AP3-anchor | TGCATCGGAGCATGGTGAAGTGTACTATCAATCTTTTTTTTTTTTTTTTTV |
| AP3                 | TGCATCGGAGCATGGTGAAGTGTACTATCAATC                   |
| Xpo-FAE-START-For   | ATGGCAGTATCAATCTTCCAAGTCTC                          |
| Xpo-FAE-STOP-Rev    | CTATTCCTTCCCCGCCACGC                                |
