# Supplementary material
Source: PubMed Central journal article supplement (PMC3416365)
Supplement: supp_78.14.4893_AEM07588-11_TableS2.pdf [file supp_78.14.4893_AEM07588-11_TableS2.pdf]

**TABLE S 2:** Results of a screening of different basidio- and ascomyceteous fungi for the production of feruloyl esterase (FAE) activity using an agar-plate assay as well as maximum FAE activities detected with methyl ferulate for these fungi in solid-state cultures during 25 days of incubation.

| Fungal species                 | Strain     | FAE activity (mU/g)                                     |             |            |
|--------------------------------|------------|---------------------------------------------------------|-------------|------------|
|                                |            | hydrolysis of ethyl ferulate in agar plate <sup>a</sup> | wheat straw | beech wood |
| <b>Basidiomycetes</b>          |            |                                                         |             |            |
| <i>Agrocybe aegerita</i>       | DSMZ22459  | +                                                       | 94          | 0          |
| <i>Coprinellus radians</i>     | DSMZ888    | +                                                       | 40          | 0          |
| <i>Mycetinis alliaceus</i>     | Zi06       | -                                                       | 54          | 40         |
| <i>Pleurotus ostreatus</i>     | K5         | +                                                       | 27          | 40         |
| <i>Pycnoporus cinnabarinus</i> | ATCC200478 | +                                                       | 13          | 43         |
| <b>Ascomycetes</b>             |            |                                                         |             |            |
| <i>Daldinia concentrica</i>    | A20        | -                                                       | 20          | 0          |
| <i>Daldinia vernicosa</i>      | A31        | -                                                       | 27          | 0          |
| <i>Kretzschmaria deusta</i>    | A29        | +                                                       | 657         | 60         |
| <i>Morchella elata</i>         | A30        | -                                                       | 0           | 40         |
| <i>Xylaria hypoxylon</i>       | A38        | +                                                       | 650         | 0          |
| <i>Xylaria polymorpha</i>      | A34        | +                                                       | 1,173       | 80         |
| <i>Xylaria polymorpha</i>      | A35        | +                                                       | 1,675       | 80         |
| <i>Xylaria polymorpha</i>      | A32        | +                                                       | 1,059       | 0          |

<sup>a</sup> (+) a clearing halo was formed around the mycelium, (-): no halo formation; growth period: 3 to 7 days.

Activities are means of three replicates with standard deviations <5%.
